# Supplementary material for: Ethnicity and excess mortality in severe mental illness: a cohort study
Source: PubMed Central journal article supplement (PMC5406616; doi:10.1016/s2215-0366(17)30097-4), 2017-05
Supplement: mmc1.pdf [file mmc1.pdf]

# THE LANCET Psychiatry

## Supplementary appendix

This appendix formed part of the original submission and has been peer reviewed. We post it as supplied by the authors.

Supplement to: Das-Munshi J, Chang C-K, Dutta R, et al. Ethnicity and excess mortality in severe mental illness: a cohort study. *Lancet Psychiatry* 2017; published online March 16. [http://dx.doi.org/10.1016/S2215-0366\(17\)30097-4](http://dx.doi.org/10.1016/S2215-0366(17)30097-4).

Supplementary material

**Figure 1** Cumulative hazard estimates for all-cause mortality by ethnic group, by time since SMI diagnosis

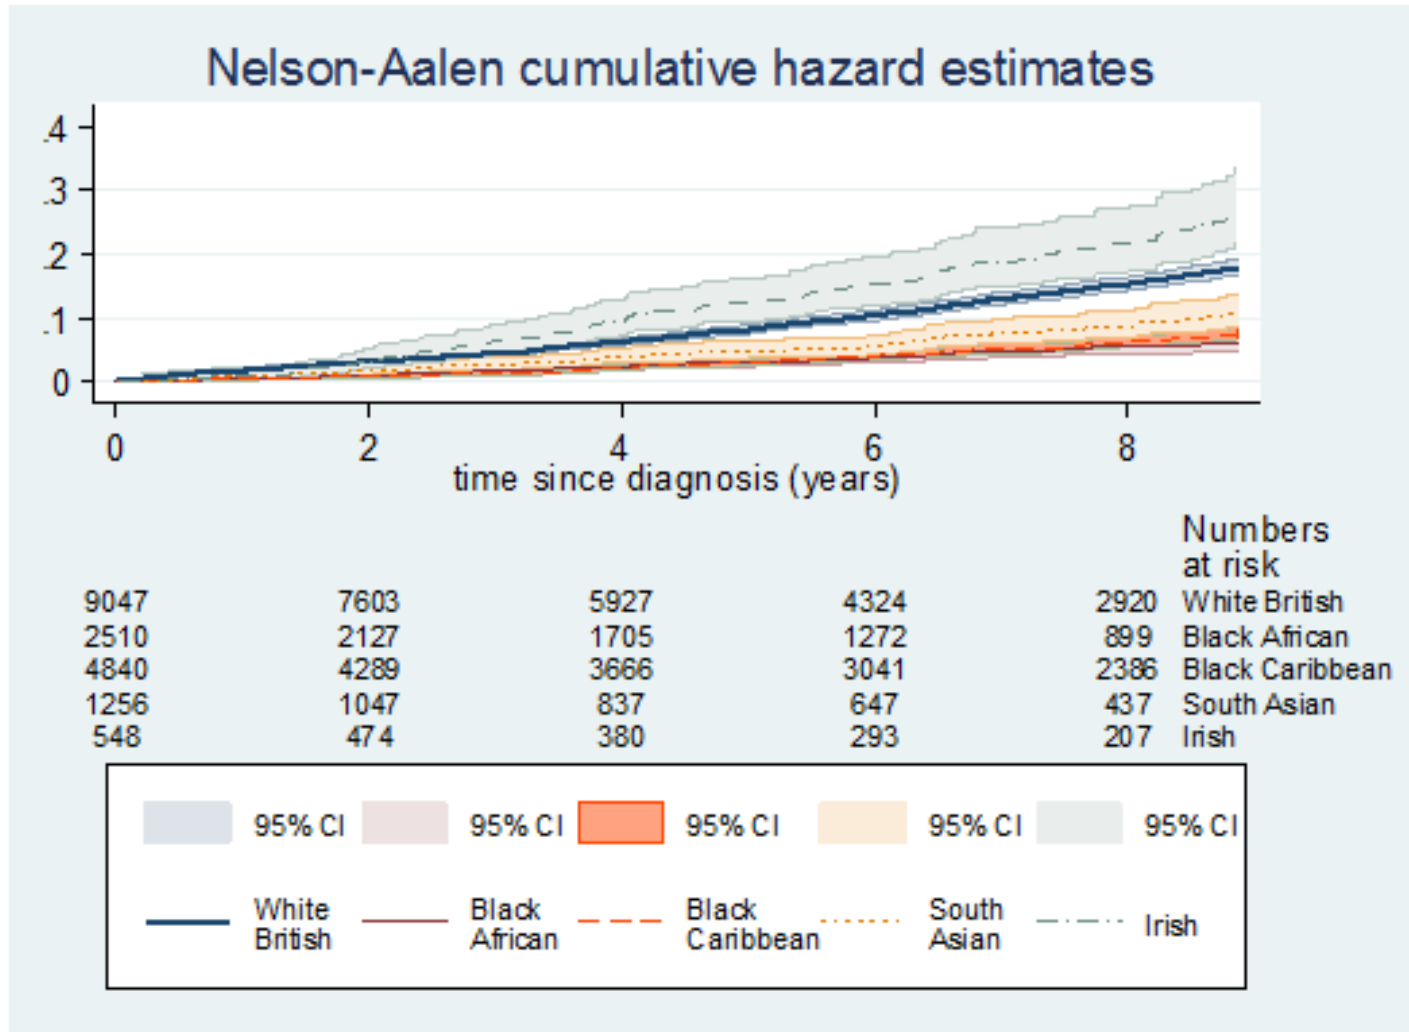

Supplementary material

Figure 2 Cumulative hazard estimates for all-cause mortality by ethnic group, by age

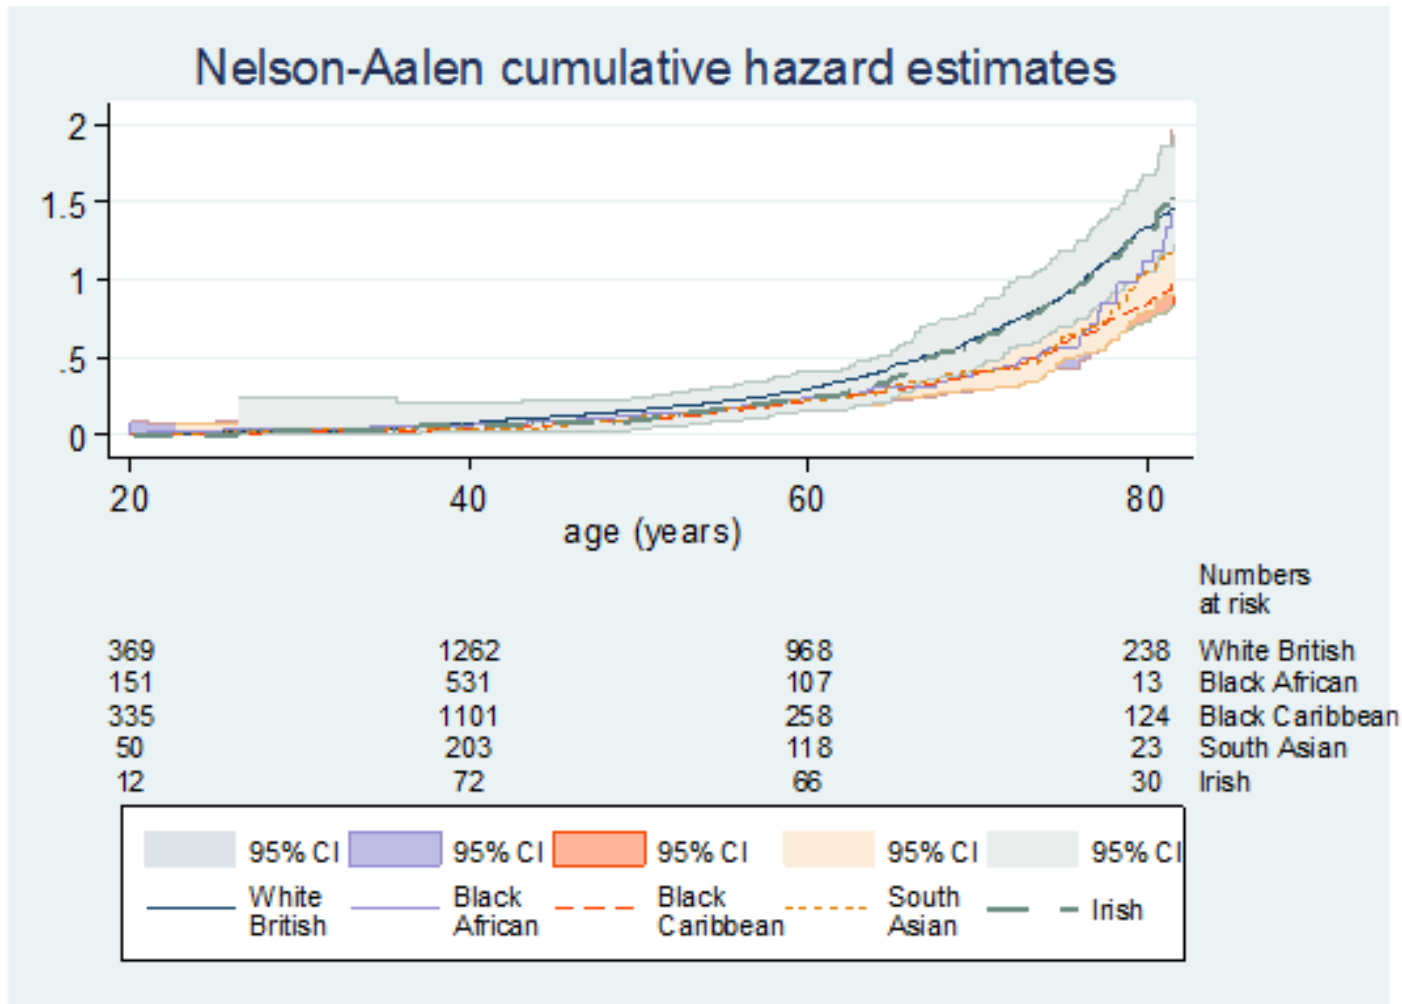

Supplementary material

Table 1: Sub-Hazard Ratios (sHRs) for all-cause mortality- sensitivity analysis<sup>1</sup>

|                            |                           |             |        | Time since diagnosis  |         |                       |         |                       |         |         |
|----------------------------|---------------------------|-------------|--------|-----------------------|---------|-----------------------|---------|-----------------------|---------|---------|
|                            |                           | Total cases | Deaths | Adjusted sHR (95% CI) | P value | Adjusted sHR (95% CI) | P value | Adjusted sHR (95% CI) | P value | P value |
|                            |                           |             |        | 0-3 years             |         | 3-7 years             |         | 7 years+              |         |         |
| Ethnicity                  | White British             | 9278        | 1142   | REF                   |         | REF                   |         | REF                   |         |         |
|                            | Black Caribbean           | 4946        | 334    | 0.49 (0.40, 0.60)     | <0.0001 | 0.94 (0.70, 1.27)     | 0.69    | 0.60 (0.53, 0.67)     | <0.0001 | <0.0001 |
|                            | Black African             | 2573        | 107    | 0.60 (0.53, 0.67)     | <0.0001 | 0.77 (0.62, 0.95)     | 0.014   | 0.49 (0.40, 0.60)     | <0.0001 |         |
|                            | South Asian               | 1279        | 96     | 0.67 (0.55, 0.82)     | <0.0001 | 0.50 (0.37, 0.66)     | <0.0001 | 0.67 (0.55, 0.82)     | <0.0001 |         |
|                            | Irish                     | 565         | 107    | 1.05 (0.88, 1.27)     | 0.57    | 1.17 (0.81, 1.71)     | 0.40    | 1.05 (0.88, 1.27)     | 0.57    |         |
|                            |                           | Total cases | Deaths | Adjusted sHR (95% CI) |         |                       |         |                       |         |         |
| Gender                     | Male                      | 9856        | 920    | REF                   |         |                       |         |                       |         |         |
|                            | Female                    | 8785        | 866    | 0.85 (0.78, 0.93)     | <0.0001 |                       |         |                       |         | <0.0001 |
| Diagnosis                  | Non-affective psychosis   | 13476       | 1370   | REF                   |         |                       |         |                       |         |         |
|                            | Affective psychosis       | 5165        | 416    | 0.76 (0.68, 0.84)     | <0.0001 |                       |         |                       |         | <0.0001 |
| Marital status             | Married/ cohabiting       | 2842        | 272    | REF                   |         |                       |         |                       |         |         |
|                            | Divorced/single/separated | 15799       | 1514   | 1.24 (1.09, 1.41)     | 0.001   |                       |         |                       |         | 0.0013  |
| Co-morbid substance misuse | None                      | 15409       | 1535   | REF                   |         |                       |         |                       |         |         |
|                            | Present                   | 3232        | 251    | 1.05 (0.92, 1.20)     | 0.48    |                       |         |                       |         | 0.48    |
| Area-level Deprivation     | Least deprived            | 3749        | 379    | REF                   |         |                       |         |                       |         |         |
|                            | 2                         | 3712        | 344    | 0.89 (0.77, 1.02)     | 0.10    |                       |         |                       |         | 0.19    |
|                            | 3                         | 3725        | 316    | 0.85 (0.74, 0.98)     | 0.030   |                       |         |                       |         |         |
|                            | 4                         | 3771        | 376    | 0.91 (0.79, 1.05)     | 0.19    |                       |         |                       |         |         |
|                            | Most deprived             | 3684        | 371    | 0.87 (0.76, 1.00)     | 0.044   |                       |         |                       |         |         |

<sup>1</sup>Sensitivity analysis: sub-Hazard ratios (sHRs) for association of each variable with all-cause mortality with emigrations out of the cohort specified as a competing risk, Wald tests used to assess strength of associations, estimates are adjusted for age plus all other variables shown in table

Supplementary material

**Table 3: Adjusted Hazard Ratios for all cause mortality<sup>1</sup>**

|                            |                           | Total cases | Deaths | Time since diagnosis                                    |                | 3-7 years             |                | 7 years+          |        | P value (LRT) |
|----------------------------|---------------------------|-------------|--------|---------------------------------------------------------|----------------|-----------------------|----------------|-------------------|--------|---------------|
|                            |                           |             |        | 0-3 years                                               | P value (Wald) | P value (Wald)        | P value (Wald) | P value (Wald)    |        |               |
| Ethnicity                  | White British             | 9278        | 1142   | REF                                                     |                | REF                   |                | REF               |        | 0.0060        |
|                            | Black Caribbean           | 4946        | 334    | 0.43 (0.29, 0.65)                                       | <0.0001        | 0.72 (0.51, 1.03)     | 0.071          | 0.83 (0.59, 1.16) | 0.28   |               |
|                            | Black African             | 2573        | 107    | 0.69 (0.36, 1.31)                                       | 0.25           | 0.72 (0.38, 1.37)     | 0.32           | 0.46 (0.24, 0.89) | <0.021 |               |
|                            | South Asian               | 1279        | 96     | 0.63 (0.35, 1.12)                                       | 0.12           | 0.63 (0.36, 1.10)     | 0.10           | 0.66 (0.37, 1.18) | 0.16   |               |
|                            | Irish                     | 565         | 107    | 1.19 (0.81, 1.75)                                       | 0.37           | 1.33 (0.93, 1.92)     | 0.12           | 1.14 (0.78, 1.68) | 0.49   |               |
|                            |                           |             |        | <b>Adjusted HR (95% CI)</b>                             |                |                       |                |                   |        |               |
|                            |                           |             |        | <b>Diagnosis, affective psychosis vs. non-affective</b> |                | <b>P value (Wald)</b> |                |                   |        |               |
| Ethnicity                  | White British             | 9278        | 1142   | 0.84 (0.73, 0.96)                                       | 0.0090         |                       |                |                   |        | 0.026         |
|                            | Black Caribbean           | 4946        | 334    | 1.07 (0.78, 1.46)                                       | 0.67           |                       |                |                   |        |               |
|                            | Black African             | 2573        | 107    | 0.90 (0.49, 1.63)                                       | 0.72           |                       |                |                   |        |               |
|                            | South Asian               | 1279        | 96     | 0.75 (0.44, 1.26)                                       | 0.27           |                       |                |                   |        |               |
|                            | Irish                     | 565         | 107    | 0.62 (0.39, 0.99)                                       | 0.047          |                       |                |                   |        |               |
| Gender                     | Male                      | 9856        | 920    | REF                                                     | REF            |                       |                |                   |        | 0.0029        |
|                            | Female                    | 8785        | 866    | 0.86 (0.78, 0.95)                                       | 0.0030         |                       |                |                   |        |               |
| Marital status             | Married/cohabiting        | 2842        | 272    | REF                                                     | REF            |                       |                |                   |        | 0.0089        |
|                            | Divorced/single/separated | 15799       | 1514   | 1.19 (1.04, 1.36)                                       | 0.010          |                       |                |                   |        |               |
| Co-morbid substance misuse | None                      | 15409       | 1535   | REF                                                     | REF            |                       |                |                   |        | 0.016         |
|                            | Present                   | 3232        | 251    | 1.19 (1.03, 1.37)                                       | 0.015          |                       |                |                   |        |               |
| Area-level Deprivation     | Least deprived            | 3749        | 379    | REF                                                     | REF            |                       |                |                   |        | 0.28          |
|                            | 2                         | 3712        | 344    | 0.90 (0.77, 1.04)                                       | 0.16           |                       |                |                   |        |               |
|                            | 3                         | 3725        | 316    | 0.88 (0.76, 1.03)                                       | 0.10           |                       |                |                   |        |               |
|                            | 4                         | 3771        | 376    | 0.90 (0.78, 1.04)                                       | 0.17           |                       |                |                   |        |               |
|                            | Most deprived             | 3684        | 371    | 0.99 (0.86, 1.15)                                       | 0.91           |                       |                |                   |        |               |

<sup>1</sup>Multivariable Cox regression model with ethnicity\*time interaction and ethnicity\*diagnosis interactions. Estimates are adjusted for all other variables displayed in the table. P value from Likelihood Ratio Tests (LRT) assessing the overall interaction of ethnicity\*diagnosis was p=0.39
